# Supplementary material
Source: PubMed Central journal article supplement (PMC5395315)
Supplement: NIHMS833155-supplement-suppl__fig__1___2.pdf [file NIHMS833155-supplement-suppl__fig__1___2.pdf]

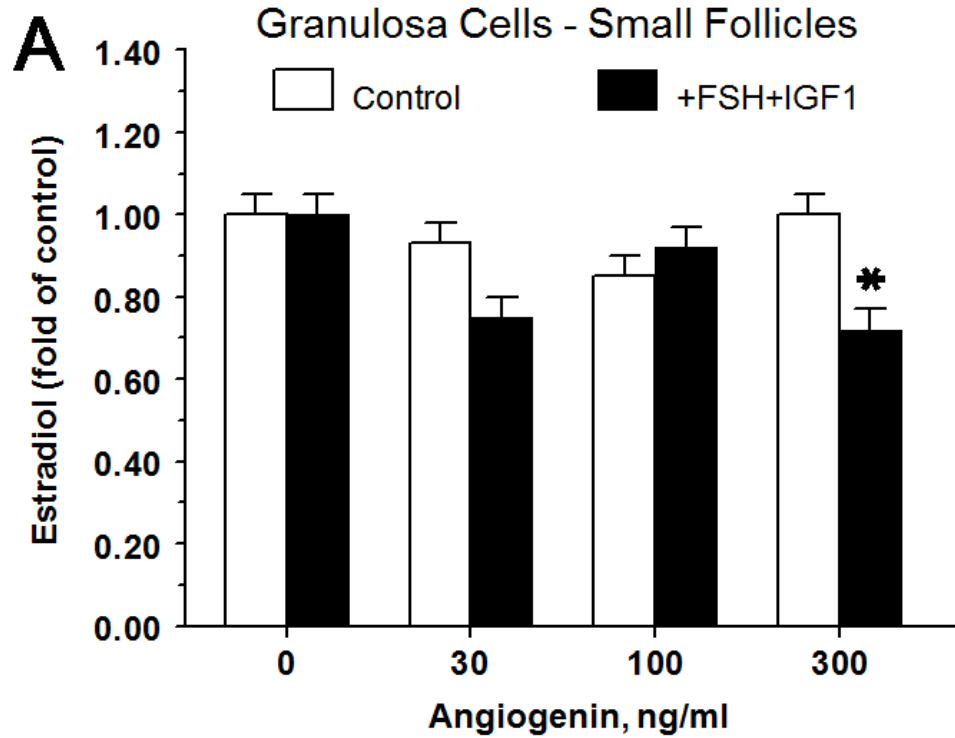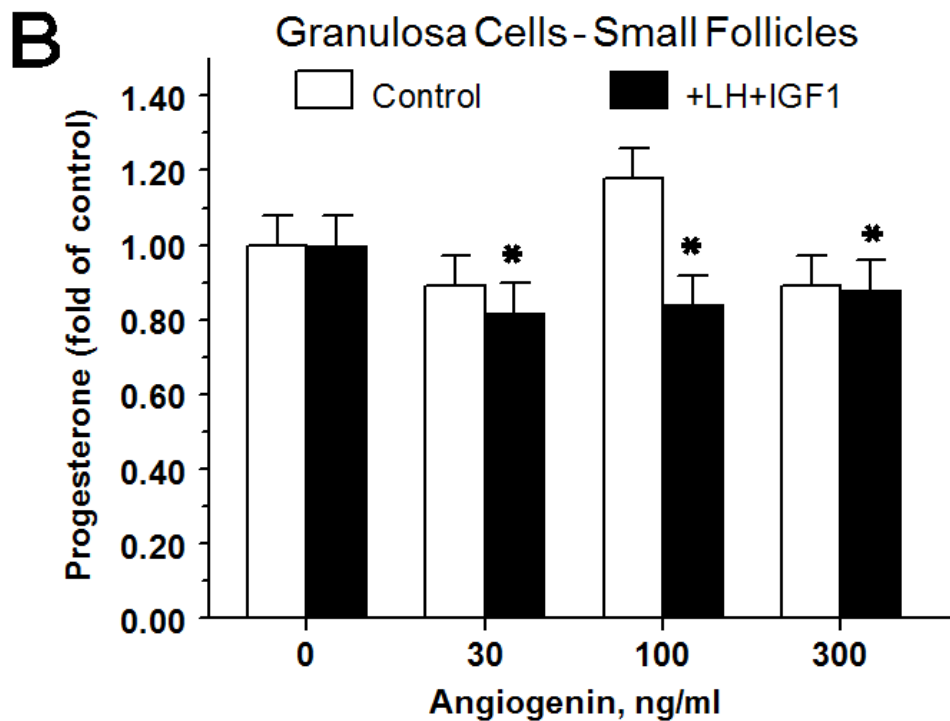

Supplementary Figure S1. Cumulative dose response of angiogenin on basal (control) and hormone stimulated (+FSH+IGF1) estradiol and progesterone production by small-follicle granulosa cells. Within treatment and panel, asterisk (\*) indicates mean differs ( $P < 0.05$ ) from 0 ng/ml dose.

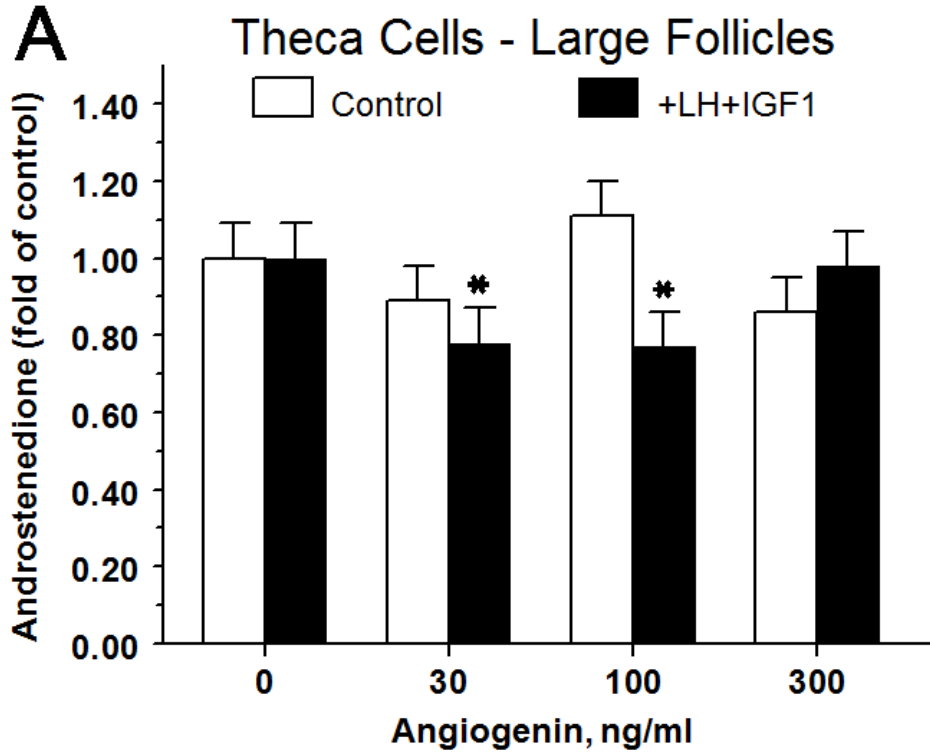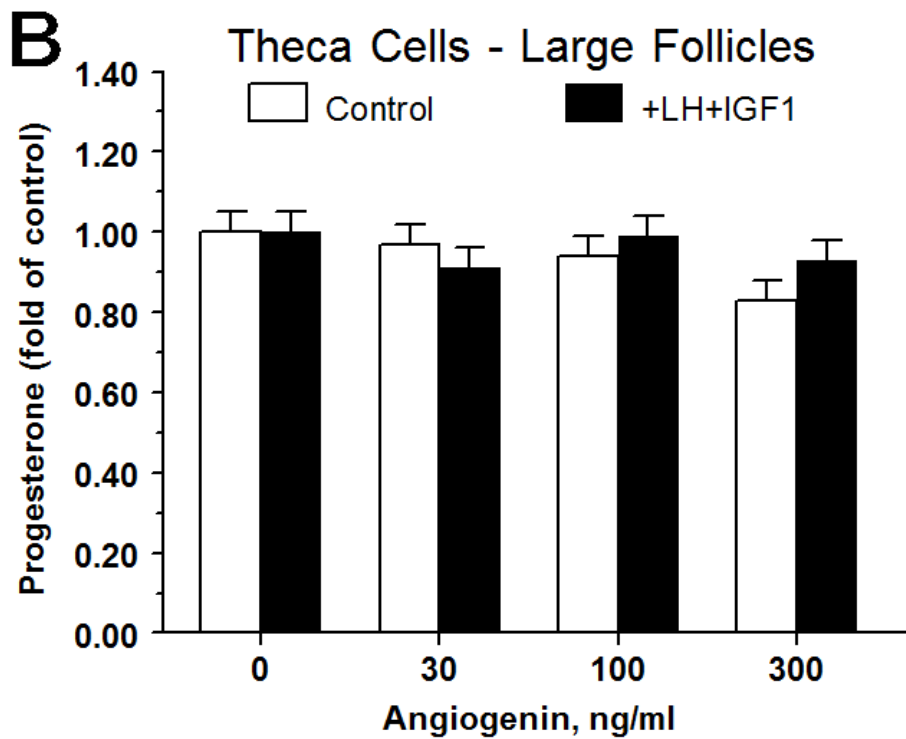

Supplementary Figure S2. Cumulative dose response of angiogenin on basal (control) and hormone stimulated (+LH+IGF1) androstenedione and progesterone production by large-follicle theca cells. Within treatment and panel, asterisk (\*) indicates mean differs ( $P < 0.05$ ) from 0 ng/ml dose.
